# Supplementary material
Source: PubMed Central journal article supplement (PMC4999938)
Supplement: JB.00372-16_zjb999094170so1.pdf [file JB.00372-16_zjb999094170so1.pdf]

**Supplemental Table 1: Strains and Plasmids**

| Designation                               | Genotype or Description                                          | Reference or Source |
|-------------------------------------------|------------------------------------------------------------------|---------------------|
| <i>Burkholderia thailandensis</i> strains |                                                                  |                     |
| MJ358                                     | E264 wild type                                                   | [1]                 |
| AN3                                       | $\Delta gbdR1$                                                   | This study          |
| AN19                                      | $\Delta gbdR2$                                                   | This study          |
| AN16                                      | $\Delta gbdR1 \Delta gbdR2$                                      | This study          |
| AN126                                     | $\Delta souR$                                                    | This study          |
| AN202                                     | $\Delta gbdR1 \Delta souR$                                       | This study          |
| AN205                                     | $\Delta gbdR2 \Delta souR$                                       | This study          |
| AN207                                     | $\Delta gbdR1 \Delta gbdR2 \Delta souR$                          | This study          |
| AN136                                     | <i>attTn7</i> vector, Zeo <sup>r</sup>                           | This study          |
| AN153                                     | <i>attTn7</i> vector, Zeo <sup>r</sup>                           | This study          |
| AN128                                     | <i>attTn7</i> vector, Zeo <sup>r</sup>                           | This study          |
| AN150                                     | <i>attTn7</i> vector, Zeo <sup>r</sup>                           | This study          |
| AN158                                     | $\Delta gbdR1$ <i>att::gbdR1</i> comp, Zeo <sup>r</sup>          | This study          |
| AN173                                     | $\Delta gbdR2$ <i>att::gbdR2</i> comp, Zeo <sup>r</sup>          | This study          |
| AN162                                     | $\Delta gbdR1 \Delta gbdR2$ <i>att::gbdR1</i> , Zeo <sup>r</sup> | This study          |
| AN164                                     | $\Delta gbdR1 \Delta gbdR2$ <i>att::gbdR2</i> , Zeo <sup>r</sup> | This study          |
| AN151                                     | <i>att::souR</i> comp, Zeo <sup>r</sup>                          | This study          |
| AN191                                     | pAN27                                                            | This study          |
| AN192                                     | $\Delta gbdR1$ + pAN27                                           | This study          |
| AN193                                     | $\Delta gbdR2$ + pAN27                                           | This study          |
| AN194                                     | $\Delta gbdR1 \Delta gbdR2$ + pAN27                              | This study          |
| AN192                                     | $\Delta souR$ + pAN27                                            | This study          |
| AN226                                     | pAN28                                                            | This study          |
| AN227                                     | pAN29                                                            | This study          |
| AN228                                     | pAN30                                                            | This study          |
| AN229                                     | pAN31                                                            | This study          |
| <i>Escherichia coli</i> strains           |                                                                  |                     |
| DH5 $\alpha$                              |                                                                  |                     |
| T7 Express                                | See manufacturer                                                 | NEB                 |
| AN133                                     | pAN13 in T7 Express                                              |                     |
| AN134                                     | pAN14 in T7 Express                                              |                     |
| AN188                                     | pAN19 in T7 Express                                              |                     |

|                     |                                                                  |            |
|---------------------|------------------------------------------------------------------|------------|
|                     |                                                                  |            |
| Plasmids            |                                                                  |            |
| pMQ132              | Yeast recombineering vector, Gm <sup>r</sup>                     | [2]        |
| pAN1                | pMQ132 derivative, Tp <sup>r</sup>                               | This study |
| pAN7                | pAN1 derivative, <i>lacZYA</i> reporter plasmid, Tp <sup>r</sup> | This study |
| pAN27               | pAN7-P <sub>glyA</sub> -408                                      | This study |
| pAN28               | pAN7-P <sub>glyA</sub> -340                                      | This study |
| pAN29               | pAN7-P <sub>glyA</sub> -251                                      | This study |
| pAN30               | pAN7-P <sub>glyA</sub> -147                                      | This study |
| pAN31               | pAN7-P <sub>glyA</sub> -85                                       | This study |
| pMAL-C2X            | N-terminal MBP affinity tagging, Amp <sup>r</sup>                | NEB        |
| pAN13               | pMAL-C2X- <i>gbdR1</i>                                           | This study |
| pAN14               | pMAL-C2X- <i>gbdR2</i>                                           | This study |
| pAN19               | pMAL-C2X- <i>souR</i>                                            | This study |
| pUC18-mini-TN7T-Zeo | <i>attTn7</i> integration vector, Zeo <sup>r</sup>               | [3]        |
| pTNS2               | carrying the <i>attTn7</i> transposase, Amp <sup>r</sup>         | [4]        |
| pAN23               | pUC18-mini-TN7T-Zeo- <i>gbdR1</i> comp                           | This study |
| pAN10               | pUC18mini-TN7T-Zeo- <i>gbdR2</i> comp                            | This study |
| pAN22               | pUC18-mini-TN7T-Zeo- <i>souR</i> comp                            | This study |
|                     |                                                                  |            |
|                     |                                                                  |            |
|                     |                                                                  |            |

**Supplemental Table 2: Primers**

|                            |                                                                    |                                                      |
|----------------------------|--------------------------------------------------------------------|------------------------------------------------------|
| Bt-gbdR1-TpFLP-1F          | gcgccccggccgcatcaagatcagatccaaggaacgcttcGAGCTC<br>GAATTAGCTTCAAA   | <i>gbdR1</i> (BTH_II1869) deletion                   |
| Bt-gbdR1-TpFLP-1R          | ggtgtgcatcattcgggggccggtttcagagttccggtttccGAGCTCGA<br>ATTGGGGATCTT | <i>gbdR1</i> (BTH_II1869) deletion                   |
| Bt-gbdR1-2F                | CGTAATCGATCAGCATCGTG                                               | <i>gbdR1</i> (BTH_II1869) deletion                   |
| Bt-gbdR1-2R                | GAAGCGTTCCTTGGATCTGA                                               | <i>gbdR1</i> (BTH_II1869) deletion                   |
| Bt-gbdR1-3F                | GGAAACCGGAACTCGAAAC                                                | <i>gbdR1</i> (BTH_II1869) deletion                   |
| Bt-gbdR1-3R                | ACGTCGAGACGCTGAGGAT                                                | <i>gbdR1</i> (BTH_II1869) deletion                   |
| BtgbdR2 proximal F         | AAG CCG TGC CGA TGT GGC TG                                         | <i>gbdR2</i> (BTH_II0968) deletion                   |
| BtgbdR2 proximal R         | AAG ATC GAC CAG CGG TAA TG                                         | <i>gbdR2</i> (BTH_II0968) deletion                   |
| BtgbdR2 tp F REVISED       | ACTACGTCGCGCGCGGACCATTACCGCTGGTCGATC<br>TTgagctcgaattagcttcaaa     | <i>gbdR2</i> (BTH_II0968) deletion                   |
| BtgbdR2 tp R REVISED       | TACGCCTTGCTGAAATGGCACGGCGAGTGAAAGCCGC<br>AGAgagctcgaattggggatctt   | <i>gbdR2</i> (BTH_II0968) deletion                   |
| BtgbdR2 post F REVISED     | TCTGCGGCTTCACTCGCCG                                                | <i>gbdR2</i> (BTH_II0968) deletion                   |
| BtgbdR2 post R REVISED     | CGCCGCCGCTCAGATAGTCG                                               | <i>gbdR2</i> (BTH_II0968) deletion                   |
| BtII0994proxF              | CGGCAATCTACGATGAGGCT                                               | <i>souR</i> (BTH_II0994) deletion                    |
| BtII0994proxR              | CGATAGGGGAAGAACACCG                                                | <i>souR</i> (BTH_II0994) deletion                    |
| BtII0994postF              | GGTCAGCGTGAAGTTAGGCA                                               | <i>souR</i> (BTH_II0994) deletion                    |
| BtII0994postR              | CCGATGTCGTCCTTCTCGTC                                               | <i>souR</i> (BTH_II0994) deletion                    |
| BtII0994tpF                | GCCGCCGGCCGATCGGCGTGGTGTCTTCCCCCTAT<br>CGgagctcgaattagcttcaaa      | <i>souR</i> (BTH_II0994) deletion                    |
| BtII0994tpR                | GCGCTTCGGGATCGTGCTGCTGCCTAACTTCACGCTGA<br>CCgagctcgaattggggatctt   | <i>souR</i> (BTH_II0994) deletion                    |
| <i>gbdR1</i> compFHi ndIII | CCTAAGCTTGAGCGACATCCCGAGCACCG                                      | <i>gbdR1</i> complement                              |
| <i>gbdR1</i> compRK pnl    | CTTGGTACCCGGGGCCGGTTTCGAGTTC                                       | <i>gbdR1</i> complement                              |
| KpnI <i>gbdR2</i> comp pF  | CTT GGTACC CTGACGTTTTCCGCTTCG                                      | <i>gbdR2</i> complement                              |
| EcoRI <i>gbdR2</i> compR   | CTT GAATC GGGATCGGTTCTGGGCTG                                       | <i>gbdR2</i> complement                              |
| KpnI II0994compF           | CTT GGTACC CCTTGC GTAACGATGCGTGGT                                  | <i>souR</i> complement (use MBP-SouR reverse primer) |
| Tp pMQ132F                 | TACGCCGTGGGTCGATGTTTGATGTTATGGAGCAGCAA<br>CGgatcccctgattcccttgt    | Generation of pAN1                                   |
| Tp pMQ132R                 | ACTCCGCGCCGGGAAGCCGATCTCGGCTTGAACGAA<br>TTGagcgttttgaagctgatgt     | Generation of pAN1                                   |
| BtPFusionYHRp              | CTACTGCCGCCAGGCAAATTCTGTTTTATCAGACCGCTT                            | Generation of pAN7 step 1                            |

|                       |                                                                   |                                                 |
|-----------------------|-------------------------------------------------------------------|-------------------------------------------------|
| 1F                    | C GAATTC CTGCCCG                                                  |                                                 |
| BtPFusionYHRp 1R      | GCAGCTGGCACGACAGGTTTCCCGACTGGAAAGCGGG<br>CAG GAATTC GAAGCGG       | Generation of pAN7 step 1                       |
| BtPFusionYHRp 2F      | CTACTGCCGCCAGGCAAATTCTGTTTTATCAGACCGCTT<br>C ccaagcttgcctgcag     | Generation of pAN7 step 2                       |
| BtPFusionYHRp 2R      | GCAGCTGGCACGACAGGTTTCCCGACTGGAAAGCGGG<br>CAG gaattCGCAGCGTATCAGGC | Generation of pAN7 step 2                       |
| glyAtogbdR1interF     | CCTGCATGCAAGGCGTCTCGTCACTGGAT                                     | Generation of pAN27                             |
| glyAtogbdR1interR     | CTTGCATGCGGGGAAGCGTTCCTTGGATCT                                    | Generation of pAN27                             |
| SphI<br>P.glyA1LacZ1  | CTT GCATGC CGCAACTAGCGTGCCATACG                                   | Generation of pAN28, use with glyAtogbdR1interR |
| SphI<br>P.glyA1LacZ2  | CTT GCATGC CTGCGCAGCGCGAGTG                                       | Generation of pAN29, use with glyAtogbdR1interR |
| SphI<br>P.glyA1LacZ3  | CTT GCATGC GAAAGCGTCTGAATTCATCAATCGG                              | Generation of pAN30, use with glyAtogbdR1interR |
| SphI<br>P.glyA1LacZ4  | CTT GCATGC CCGCTGCGGCGGAAC                                        | Generation of pAN31, use with glyAtogbdR1interR |
| gbdR1EMSA2F           | GGGGTTGGCGTTCGACATAA                                              | EMSA Probe 2                                    |
| gbdR1EMSA2R           | CGGAAAAGGGAAAGAAAGCGT                                             | EMSA Probe 2                                    |
| BIOgbdR1EMSA2F        | BIO-GGGGTTGGCGTTCGACATAA                                          | EMSA Probe 2                                    |
| gbdR1EMSA3R           | GCTAAACCCTAGATCGGCGG                                              | EMSA Probe 1                                    |
| gbdR2EMSA1F           | CAGCGTATGCAGGAACGGG                                               | EMSA Probe 1                                    |
| BIOgbdR1EMSA3F        | BIO-TGTCGTTGCGATTTTAGCCG                                          | EMSA Probe 1                                    |
| SarOxiEMSA1F          | CGGTCATGTCTGCAAATCGT                                              | EMSA Probe 3                                    |
| SarOxiEMSA1R          | GCCGATAGAACAAAAACGGCA                                             | EMSA Probe 3                                    |
| BioSarOxiEMSA1F       | BIO-CGGTCATGTCTGCAAATCGT                                          | EMSA Probe 3                                    |
| pMALC2XgbdR1F         | CCTGGATCCTGCCCCACCGCACC                                           | MBP-GbdR1                                       |
| RSFgbdR1R             | CTT AAG CTT TCA GCG CGC CGA CAC GCG                               | MBP-GbdR1                                       |
| MALgbdR2F             | CCG GGATCC GTG ACG TCC GCC GCC GCT                                | MBP-GbdR2                                       |
| 6hisgbdR2R            | CTTAAGCTTTCAGCGCGCCGACACGCG                                       | MBP-GbdR2                                       |
| BamHI II0994 pMAL F   | CCG GGATCC GTGCGTTTCGGCGATGGTTC                                   | MBP-SouR                                        |
| HindIII II0994 pMAL R | CCT AAGCTT TCAGCGAGCGCCCTC                                        | MBP-SouR and souR complementation               |
| BtRplURTF             | CAGTACAAGGTTGCCGTTGG                                              | rplU qRT-PCR set                                |
| BtRplURTR             | CCGTGCTTTTGGTAGTGCTTC                                             | rplU qRT-PCR set                                |
| II1861RTF             | GCAGCAGATACGGCTCCATC                                              | gbcA qRT-PCR set                                |
| II1861RTR             | GCAACGAGGAAAAAGGGTCC                                              | gbcA qRT-PCR set                                |
| II0996RTF             | CTCGAACTACCTGTGGGACG                                              | soxB qRT-PCR set                                |

|                   |                      |                          |
|-------------------|----------------------|--------------------------|
| II0966RTR         | AAGTTGATCGTCGGCTCGAT | <i>soxB</i> qRT-PCR set  |
| II0994RTF         | CGTTGCCTTTCTGCATCTCG | <i>souR</i> qRT-PCR set  |
| II0994RTR         | TGCGTGAGCTGGTTCCATTA | <i>souR</i> qRT-PCR set  |
| BtgbdR1 RT F      | AGTGCTCAGGATGGCAAAC  | <i>gbdR1</i> qRT-PCR set |
| BtgbdR1 RT R      | CAGATTTTCCAATGGATCG  | <i>gbdR1</i> qRT-PCR set |
| gbdR2 set3 RTF    | CAGGTGTCCGAGCAGTTCAT | <i>gbdR2</i> qRT-PCR set |
| gbdR2 set3<br>RTR | CGGCGACACGTTCAGATAGA | <i>gbdR2</i> qRT-PCR set |

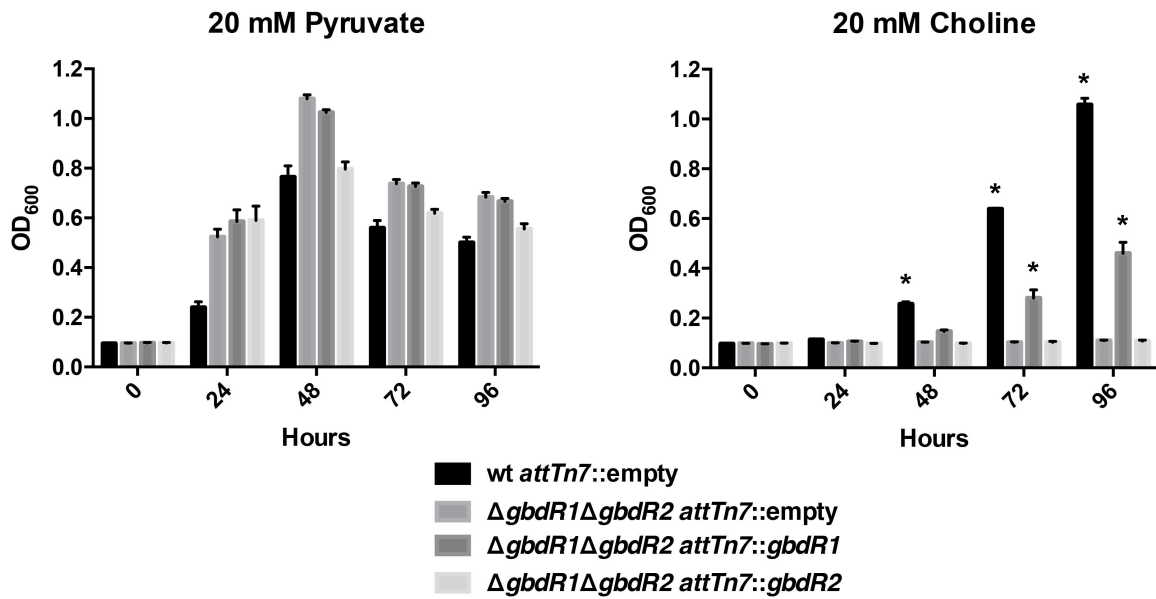

**Supplementary Figure 1.** Complementation of  $\Delta gbdR1\Delta gbdR2$  with *gbdR1* alone is able to restore the ability of *B. thailandensis* to utilize choline as a carbon source, but *gbdR2* alone is unable to complement the metabolic deficiency. Data shown are averaged from three experiments each with three biological replicates and error bars represent SEM. Data analyzed by two-way ANOVA with Dunnett's post-test using the double deletion mutant as the comparator making comparisons within each time point. The asterisks indicate  $p < 0.01$ .

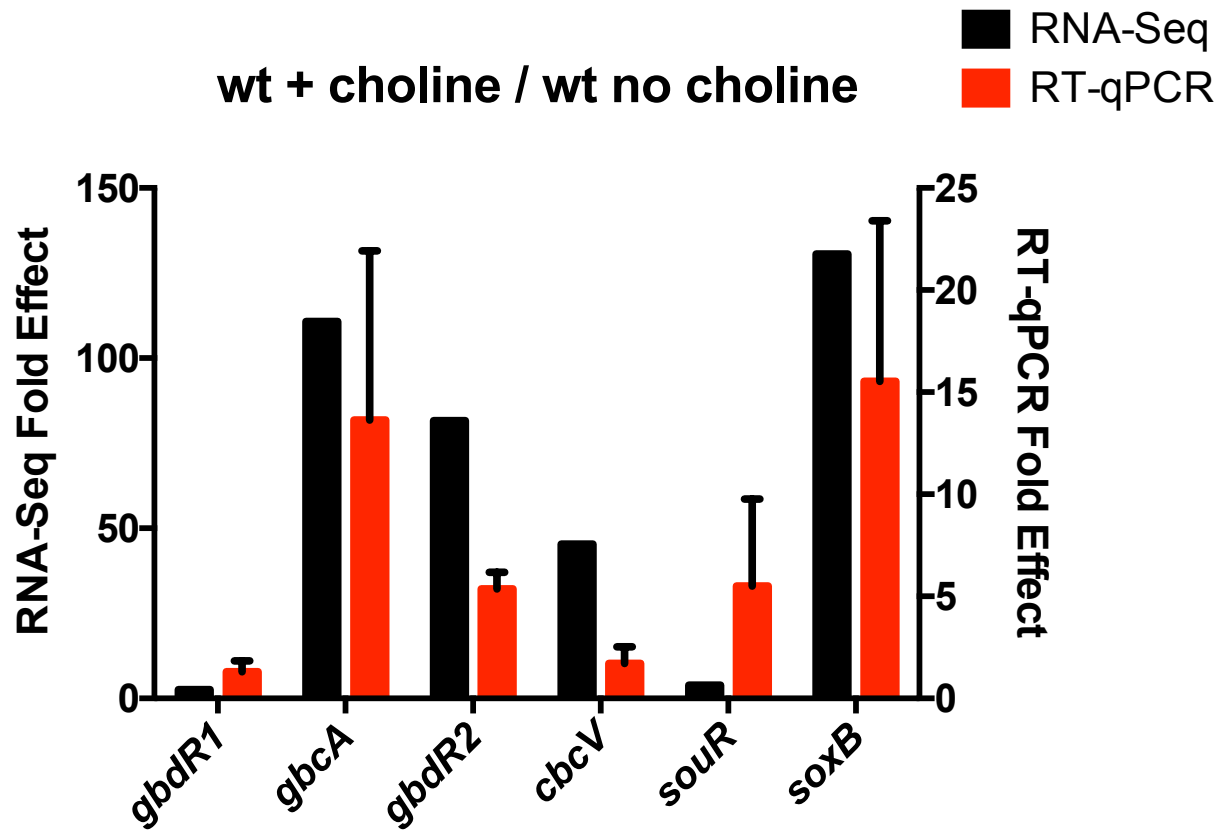

**Supplementary Figure 2.** Validation of RNA-Seq experiments by qRT-PCR supports the findings of the RNA-Seq experiment. RNA-Seq values were normalized within DEseq based on library size while the RT-qPCR values were normalized to the *rplU* transcript levels. Both data sets are expressed here as fold change in expression scaled to their own respective y-axes.

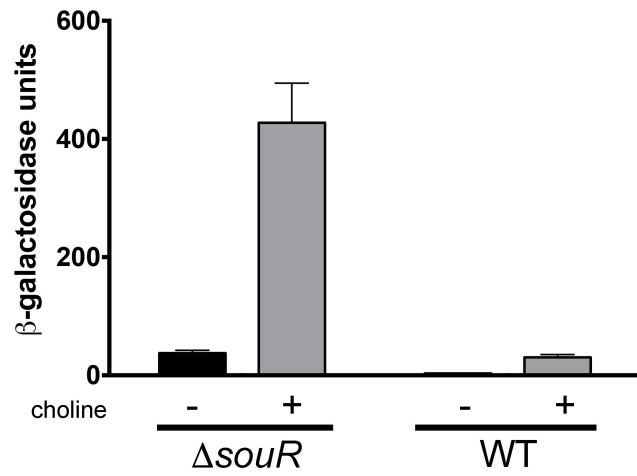

**Supplementary Figure 3.** pAN27 is still responsive to choline in  $\Delta souR$ , and  $\beta$ -galactosidase activity seems to be induced to even higher levels as compared to wild type. This suggests that SouR is not required for the induction of *glyA* promoter. Data shown are averaged from three experiments each with three biological replicates and error bars represent SEM.



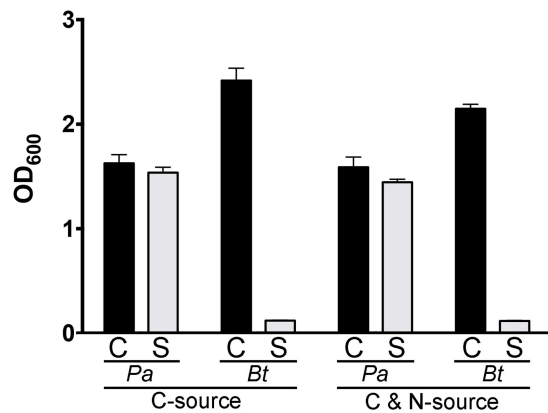

**Supplementary Figure 4.** *B. thailandensis* can utilize choline as either a carbon or carbon and nitrogen source. *B. thailandensis* is unable to utilize sarcosine as a carbon or carbon and nitrogen source, unlike *P. aeruginosa*. Strains were grown in MOPS minimal media or MOPS minimal media without NH<sub>4</sub>, with either 40 mM or choline (C) or sarcosine (S) for 72 hours at 37 °C. Data shown are averaged from three experiments each with three biological replicates and error bars represent SEM.

### Supplemental References

1. Brett, P.J., D. DeShazer, and D.E. Woods, *Burkholderia thailandensis* sp. nov., a *Burkholderia pseudomallei*-like species. *Int J Syst Bacteriol*, 1998. **48 Pt 1**: p. 317-20.
2. Shanks, R.M., et al., *New yeast recombineering tools for bacteria*. *Plasmid*, 2009. **62(2)**: p. 88-97.
3. Choi, K.H. and H.P. Schweizer, *mini-Tn7 insertion in bacteria with single attTn7 sites: example Pseudomonas aeruginosa*. *Nat Protoc*, 2006. **1(1)**: p. 153-61.
4. Choi, K.H., et al., *A Tn7-based broad-range bacterial cloning and expression system*. *Nat Methods*, 2005. **2(6)**: p. 443-8.
